# Supplementary material for: An evaluation of power transfer functions for HDR video compression
Source: Springer Nature journal article supplement (doi:10.1007/s00371-016-1322-0), 2016-10-06
Supplement: 371_2016_1322_MOESM1_ESM.pdf [file 371_2016_1322_MOESM1_ESM.pdf]

# An evaluation of Power Transfer Functions for HDR video compression – Supplementary Material

Jonathan Hatchett, Kurt Debattista, Ratnajit Mukherjee,  
Thomas Bashford-Rogers, Alan Chalmers

## 1 Analysis of Power Function Images

The selection of images used for the analysis of power functions.

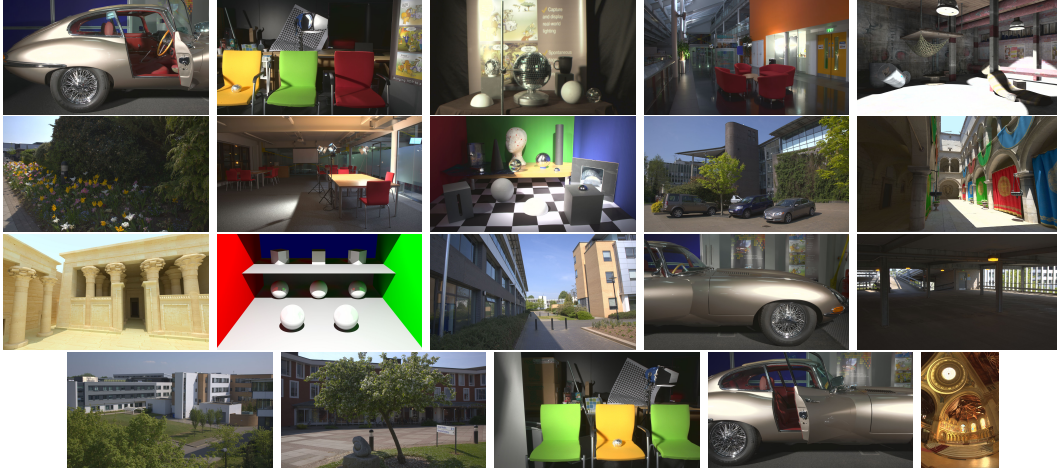

Figure 1: Images used for evaluation of  $\gamma$  variation at a selection of bit-depths.

## 2 Computational Performance Results

Results showing the decoding computational performance of  $PTF'_4$  against  $PQ_{forward}$ ,  $PTF'_4$  LUT and  $PQ_{forward}$  LUT.

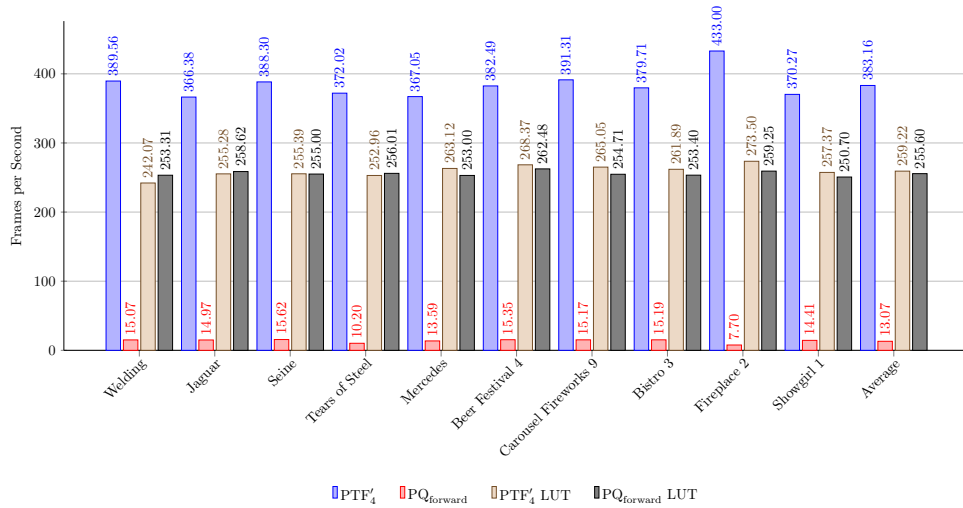

Figure 2: Difference in decoding time in frames per second between  $PTF'_4$ ,  $PQ_{forward}$  and their LUT equivalents. Higher bars indicate faster decoding performance.

### 3 HDR-VDP-2.2.1 Sequence Results

Results of the evaluation of PTF, HLG, Fraunhofer, HDRV and PQ for individual sequences.

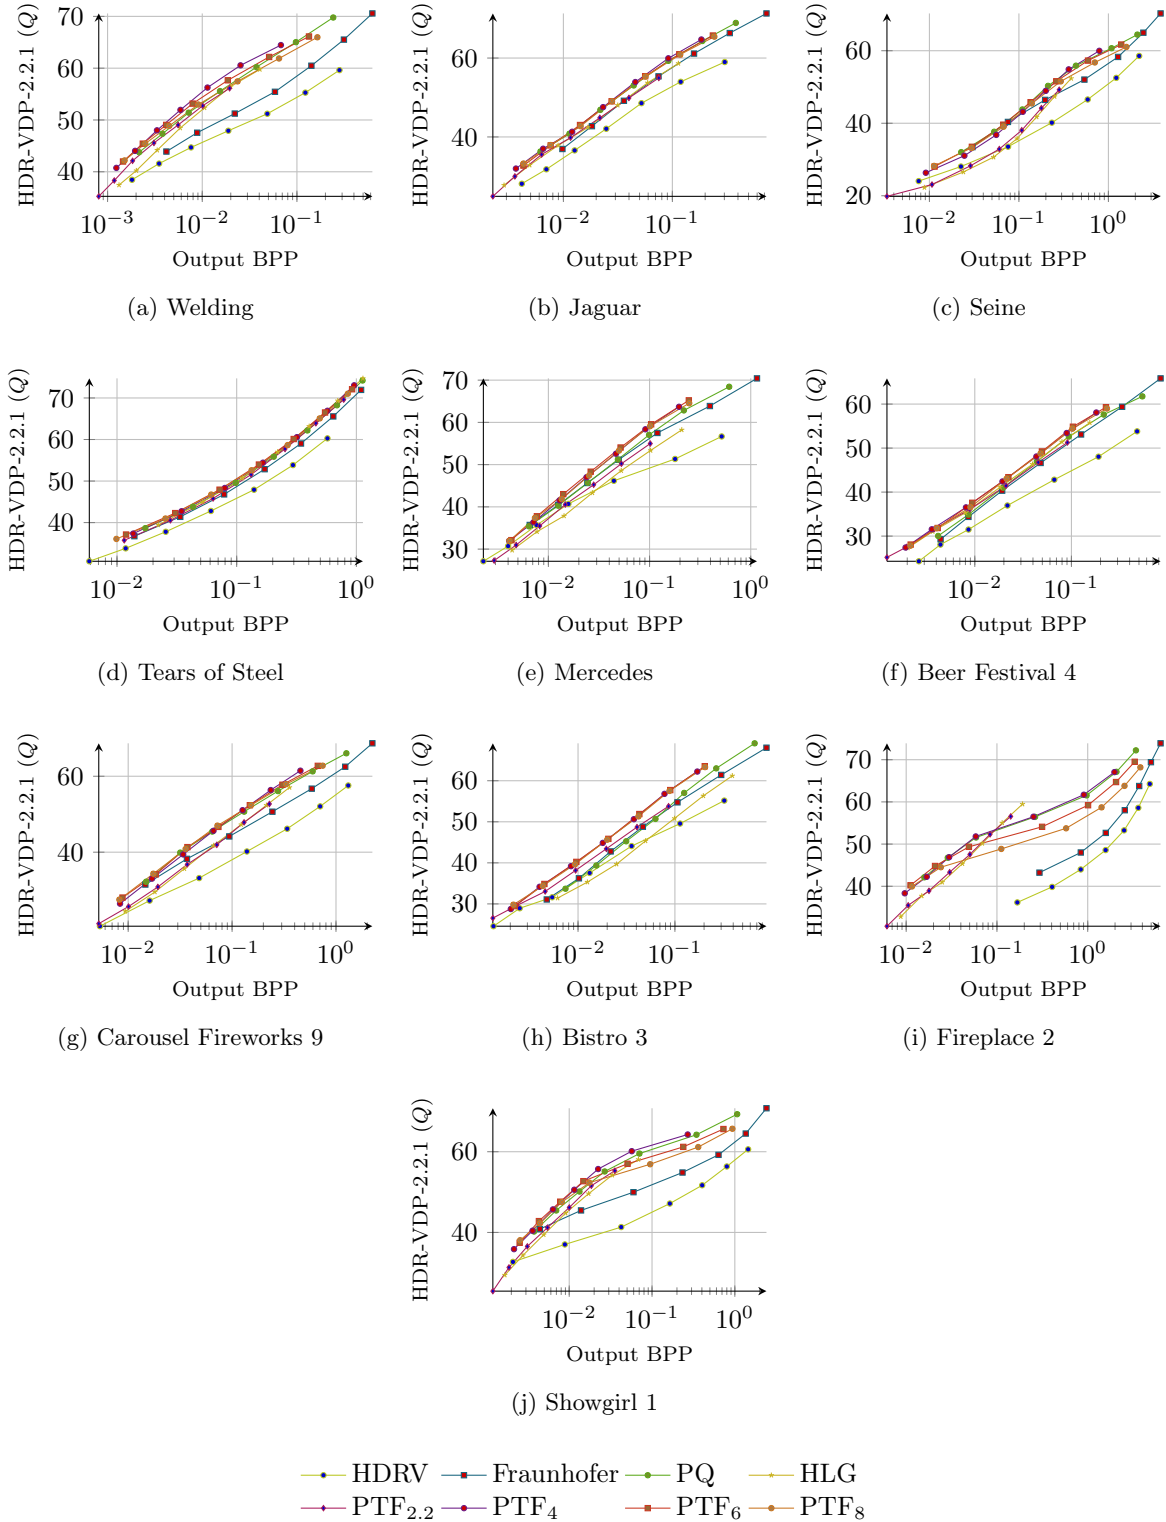

Figure 3: Rate distortion characteristics showing how the different HDR video compression methods perform on a variety of sequences. The rate is measured in output bits per pixel (BPP) and the distortion as a HDR-VDP-2.2.1  $Q$  correlate. Figures are presented with a logarithmic x axis to improve clarity.

## 4 Bjøntegaard Delta Bit-rate Metric Results

Bjøntegaard Delta bit-rate metric results showing pair-wise comparison between methods for the reduction in bit-rate achieved for the same HDR-VDP-2.2.1  $Q$  correlate result.

|                          | <b>PTF<sub>2.2</sub></b> | <b>PTF<sub>4</sub></b> | <b>PTF<sub>6</sub></b> | <b>PTF<sub>8</sub></b> | <b>HDRV</b> | <b>Fraun.</b> | <b>PQ</b> | <b>HLG</b> |
|--------------------------|--------------------------|------------------------|------------------------|------------------------|-------------|---------------|-----------|------------|
| <b>PTF<sub>2.2</sub></b> | 0.0%                     | 42.6%                  | 22.8%                  | 7.7%                   | -80.9%      | -59.1%        | 24.4%     | -5.8%      |
| <b>PTF<sub>4</sub></b>   | -29.9%                   | 0.0%                   | -13.3%                 | -29.1%                 | -86.4%      | -70.1%        | -4.8%     | -33.2%     |
| <b>PTF<sub>6</sub></b>   | -18.6%                   | 15.4%                  | 0.0%                   | -18.9%                 | -84.2%      | -66.2%        | 9.8%      | -22.6%     |
| <b>PTF<sub>8</sub></b>   | -7.1%                    | 41.0%                  | 23.3%                  | 0.0%                   | -81.6%      | -59.1%        | 33.8%     | -8.2%      |
| <b>HDRV</b>              | 424.6%                   | 635.9%                 | 532.0%                 | 444.4%                 | 0.0%        | 101.9%        | 536.9%    | 397.5%     |
| <b>Fraunhofer</b>        | 144.7%                   | 234.9%                 | 195.5%                 | 144.6%                 | -50.5%      | 0.0%          | 219.0%    | 138.2%     |
| <b>PQ</b>                | -19.6%                   | 5.1%                   | -8.9%                  | -25.3%                 | -84.3%      | -68.7%        | 0.0%      | -25.4%     |
| <b>HLG</b>               | 6.2%                     | 49.7%                  | 29.2%                  | 8.9%                   | -79.9%      | -58.0%        | 34.0%     | 0.0%       |

Table 1: Bjøntegaard delta bit-rate results showing the average reduction in bit-rate achieved to maintain quality over a ten sequences. Negative numbers denote the percentage saving in bit-rate by the row method in order to result in a sequence with the same HDR-VDP-2.1.1  $Q$  correlate result as the column method.
